# Supplementary material for: Environmentally responsive self-assembly of mixed poly(tert-butyl acrylate)–polystyrene brush-grafted silica nanoparticles in selective polymer matrices
Source: Royal Society of Chemistry journal article supplement (doi:10.1039/c5sm00193e), 2015-01-01
Supplement: c5sm00193e9.pdf [file c5sm00193e9.pdf]

## Supplementary Information

### **Environmentally responsive self-assembly of mixed poly(*tert*-butyl acrylate)/polystyrene brush-grafted silica nanoparticles in selective polymer matrices**

Saide Tang,<sup>a</sup> Tara L. Fox,<sup>b</sup> Ting-Ya Lo,<sup>c</sup> Jonathan M. Horton,<sup>d</sup> Rong-Ming Ho,<sup>c</sup> Bin Zhao,<sup>\*d</sup>  
Phoebe L. Stewart<sup>\*b</sup> and Lei Zhu<sup>\*a</sup>

<sup>a</sup> *Department of Macromolecular Science and Engineering, Case Western Reserve University, Cleveland, Ohio 44106-7202, United States*

<sup>b</sup> *Department of Pharmacology, Case Western Reserve University, Cleveland, Ohio 44106, United States*

<sup>c</sup> *Department of Chemical Engineering, National Tsing Hua University, Hsinchu 30013, Taiwan*

<sup>d</sup> *Department of Chemistry, University of Tennessee, Knoxville, Tennessee 37996, United States*

## I. Comparison of Mixed Brush Morphology in Bulk and Thin Film Nanocomposites

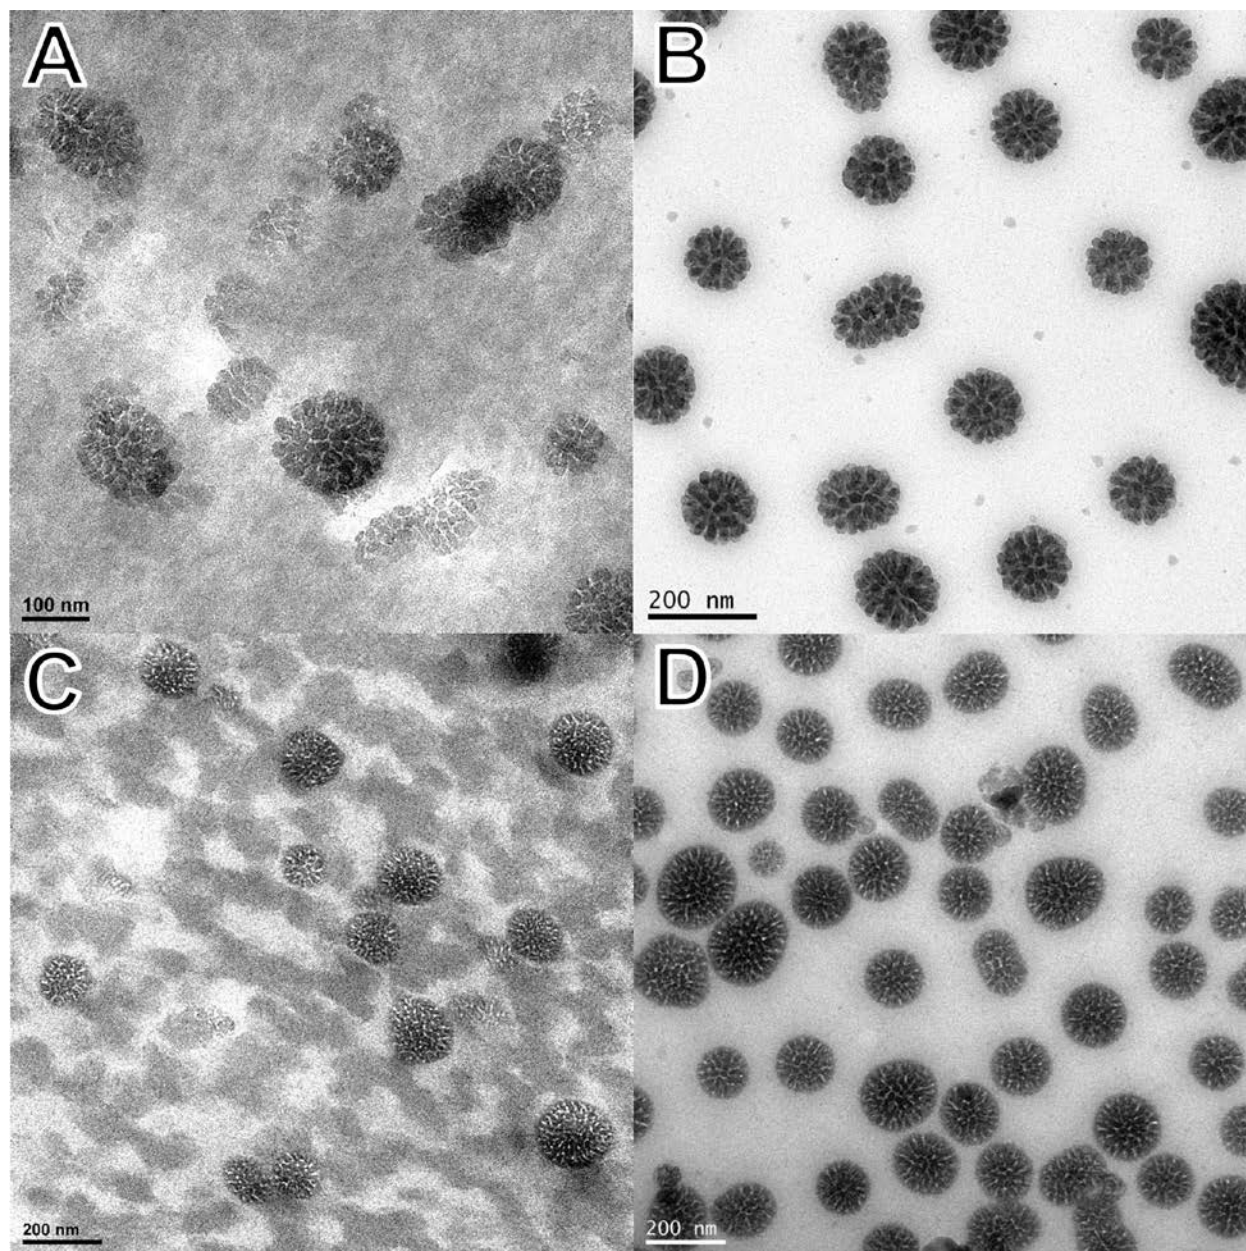

**Fig. S1.** Bright-field TEM micrographs for the mixed PtBA/PS brush-grafted 67 nm silica nanoparticles in (A & B) PtBA 5 kDa and (C & D) PCHMA 3 kDa matrices. (A & C) are microtomed thin slices from the bulk samples and (B & D) are the drop-cast film samples.
